# Supplementary material
Source: Frontiers journal article supplement (https://www.frontiersin.org/articles/290696)
Supplement: Image_1.PDF [file Image_1.PDF]

## supplemental file

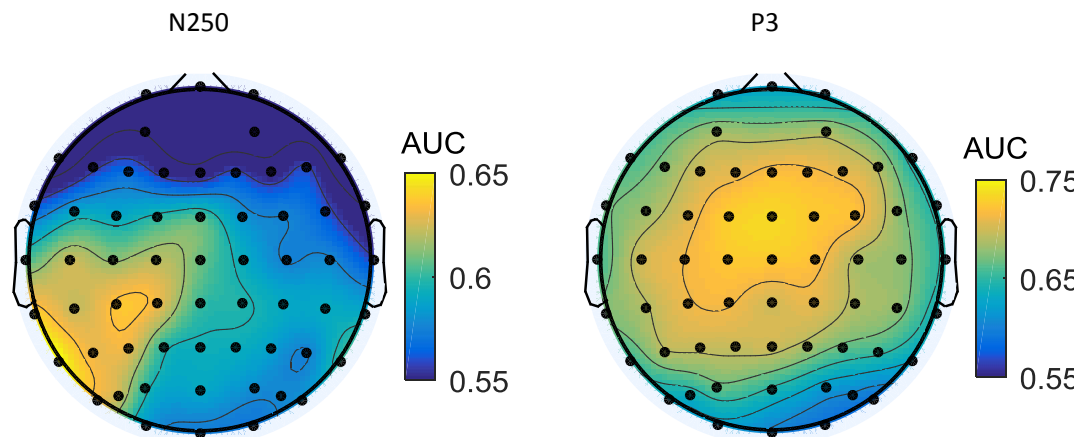

Fig. 1. The scalp topograph of performance of single-trial ERP detection using N250 or P3 component in every single electrode. The performance averaged across subjects is shown.
